# Supplementary material
Source: Springer Nature journal article supplement (https://www.springermedizin.de/resource/supplementary/12936_2013_2812_MOESM1_ESM.pdf/9544226)
Supplement: MOESM1 [file 9544226]

**Supplemental Material:** Questionnaire used at the private clinic

ID No. \_\_\_\_\_  
Time: \_\_\_\_\_

Date: \_\_\_\_/\_\_\_\_/\_\_\_\_ dd/mm/yyyy

**PATIENT DETAILS**

AGE \_\_\_\_\_ (in yrs)

SEX M  F

**CURRENT SYMPTOMS**

Duration of current illness Symptoms (current)  
\_\_\_\_\_ days

Temperature \_\_\_\_\_ °C

|          | No                       | Yes                      |
|----------|--------------------------|--------------------------|
| Fever    | <input type="checkbox"/> | <input type="checkbox"/> |
| Chills   | <input type="checkbox"/> | <input type="checkbox"/> |
| Sweating | <input type="checkbox"/> | <input type="checkbox"/> |
| Headache | <input type="checkbox"/> | <input type="checkbox"/> |
| Other    | <input type="checkbox"/> | <input type="checkbox"/> |

Specify: \_\_\_\_\_

**RECENT CLINICAL HISTORY**

Symptoms (past month)

|          | No                       | Yes                      |
|----------|--------------------------|--------------------------|
| Fever    | <input type="checkbox"/> | <input type="checkbox"/> |
| Chills   | <input type="checkbox"/> | <input type="checkbox"/> |
| Sweating | <input type="checkbox"/> | <input type="checkbox"/> |
| Headache | <input type="checkbox"/> | <input type="checkbox"/> |
| Other    | <input type="checkbox"/> | <input type="checkbox"/> |

Specify: \_\_\_\_\_

**TREATMENT**

(In the past month, what type of medicines have you taken?)

|                           | No                       | Yes                      |
|---------------------------|--------------------------|--------------------------|
| Chloroquine               | <input type="checkbox"/> | <input type="checkbox"/> |
| Sulfadoxine/Pyrimethamine | <input type="checkbox"/> | <input type="checkbox"/> |
| Primaquine                | <input type="checkbox"/> | <input type="checkbox"/> |
| Alu                       | <input type="checkbox"/> | <input type="checkbox"/> |
| Other                     | <input type="checkbox"/> | <input type="checkbox"/> |

Specify: \_\_\_\_\_

**QUESTIONS**

Did you immigrate to Mwaya? If so, from where did you immigrate?

\_\_\_\_\_

Do you have a bed net at home?

\_\_\_\_\_

If you have a bed bet, do you regularly sleep under the bed net at nighttime?

\_\_\_\_\_

If you have a bed net, how often do you wash it? \_\_\_\_\_

Mang'ula RDT? \_\_\_\_\_
